# Supplementary material for: An Atlas of Surra in Spain: A Tool to Support Epidemiological Investigations and Disease Control
Source: MDPI journal article supplement (doi:10.3390/ani14020243), 2024-01-12
Supplement: s1 [file s1]

## **Supplementary Material:**

### **File 1: Structure of the database.**

#### **Source sheet**

- **Source\_ID:** Unique numeric identifier for each document used in the database.
- **Initials:** Initial of the name of the main author of the document.
- **Main\_Author:** Surname of the main author of the document.
- **Authors:** Surname and initial of the name of all the authors of the document.
- **Source\_Name:** Full title of the document.
- **Country:** Country where the document was made.
- **Year:** Year in which the article was published.
- **Grey\_document:** This designation includes documents from sampling and/or unpublished studies.
- **AT\_Data:** Presence of information on animal trypanosomosis in the document.
- **File\_name:** Name of the file in the repository.
- **External\_link:** Link to access online publication.
- **Additional\_information:** Additional notes relating to each of the documents.
- **Journal:** Scientific journal in which the paper has been published.
- **Publisher:** Editor of the scientific journal.
- **Access:** Shows via which platform the document can be accessed.
- **Availability:** Indicates whether the document is available for retrieval from the internet.
- **Accessed\_on:** Date on which the document was obtained.
- **Report\_type:** Document type.
- **Conference:** In the case of oral communications, conference where the presentation took place.

#### **Geo\_data sheet**

- **Source\_ID:** Numeric identifier of the document from which the localization originates (related to the same section in the Source sheet).
- **Location\_ID:** Numeric identifier of the specific location.
- **Country:** Country to which the location belongs.
- **Location\_name:** Name assigned to the specific location or area.
- **Province:** Province to which the location belongs.
- **District\_Island:** In the case of the Canary Islands, the island to which the location belongs.
- **Municipality:** Municipality to which the location belongs.
- **Long:** Longitude
- **Lat:** Latitude
- **Geo\_source:** Application or website used to obtain and/or geo-reference the location.
- **Location\_notas:** Notes relating to each of the locations.
- **Area:** In some cases, where it has not been possible to obtain an exact location, total area in km<sup>2</sup> where the farm is estimated to be located.

## Epi\_data sheet

- **Source\_ID**: Numeric identifier of the document from which the sample is taken (related to the same section in Source sheet and Geo\_data sheet).
- **Location\_ID**: Numerical identifier of the location, relating the sampling to the location.
- **Survey\_ID**: Numerical identifier of the sample.
- **Month\_ST**: Month in which sampling started.
- **Year\_ST**: Year in which sampling started.
- **Month\_END**: Month in which sampling ended.
- **Year\_END**: Year in which sampling ended.
- **Sample\_size**: Total number of animals sampled.
- **Note\_size**: Comments on the number of animals sampled.
- **Species\_AN**: Species sampled.
- **Breed\_AN**: Specific breed of animals sampled.
- **Age\_AN**: Age or age range of animals sampled.
- **Sex\_AN**: Sex of animals sampled.
- **Husb\_AN**: Type of livestock where the animals were kept.
- **T\_evansi\_presence**: Presence or absence of *T. evansi* in animals.
- **T\_lewisi\_presence**: Presence or absence of *T. lewisi* in animals.
- **T\_evansi**: Number of animals infected with *T. evansi*.
- **T\_lewisi**: Number of animals infected with *T. lewisi*.
- **Diagnostic**: Extract from the document on the diagnostic technique used.
- **Diagnostic\_CAT**: Full name of the diagnostic technique.
- **Diagnostic\_CAT\_2**: Acronym/acronym of the diagnostic technique.
- **Chemotherapy**: Indication of treatment to the animals.
- **Chemo\_CAT**: Name of the medical product used.
- **Notes**: Sampling notes.
- **Additional\_info**: Additional information on sampling.
